# Supplementary material
Source: Elsevier journal article supplement (https://www.sciencedirect.com/science/article/pii/S2530064418301603)
Supplement: mmc1 [file S2530064418301603:mmc1.pdf]

## **SUPPLEMENTARY MATERIAL**

Impacts of climate changes on spatio-temporal diversity patterns of Atlantic Forest  
primates

Adriana Almeida de Lima<sup>a</sup>, Míriam Plaza Pinto<sup>b\*</sup>, Carlos Eduardo de Viveiros Grelle<sup>c</sup>,  
Milton Cezar Ribeiro<sup>d</sup>

<sup>a</sup> Programa de Pós-Graduação em Ecologia, Centro de Biociências, Universidade  
Federal do Rio Grande do Norte (UFRN), 59072-970 Natal, RN, Brazil. ORCID ID:  
0000-0002-4866-9809. [adrianalmeidaliima@gmail.com](mailto:adrianalmeidaliima@gmail.com)

<sup>b</sup> Departamento de Ecologia, Centro de Biociências, Universidade Federal do Rio  
Grande do Norte (UFRN), 59072-970 Natal, RN, Brazil. ORCID ID: 0000-0002-4030-  
5015. [miriamplazapinto@yahoo.com.br](mailto:miriamplazapinto@yahoo.com.br)

<sup>c</sup> Departamento de Ecologia, Universidade Federal do Rio de Janeiro, PO Box 68020,  
21941-902 Rio de Janeiro, Brazil. ORCID ID: 0002-8586-8655. [cevgrelle@gmail.com](mailto:cevgrelle@gmail.com)

<sup>d</sup> Laboratório de Ecologia Espacial e Conservação (LEEC), Departamento de Ecologia,  
Instituto de Biociências, Universidade Estadual Paulista (UNESP), 13506-900 Rio  
Claro, São Paulo, Brazil. ORCID ID: 0000-0002-4312-202X.  
[miltinho.astronauta@gmail.com](mailto:miltinho.astronauta@gmail.com)

## Study area

Tropical forests will suffer the effects of changes in climate, such as precipitation and temperature patterns (Chow et al., 2013), and this has recently given the title to the Atlantic Forest as the third hotspot of high vulnerability to climate change (Bellard et al., 2014). Our study area is the Brazilian Atlantic Forest (Fig. S1). The Atlantic Forest is the second largest forest domain in South America, extending from the Brazilian northeast to the east of Argentina and Paraguay (Câmara, 2003; Huang et al., 2007). It is a biodiversity hotspot (Myers et al., 2000) and has approximately 1 to 8% of all known fauna and flora species in the world (Silva & Casteleti, 2003). The large latitudinal, longitudinal (5°S-31°S, 35°W-58°W) and altitudinal (0 to 2 700 m) ranges provide different climatic conditions along its length and a wide variety of phytophysionomies and associated ecosystems (Pinto & Brito, 2003). The Atlantic Forest has an original area of approximately 112 million ha and covers 15 Brazilian states, and there are about 28% of Atlantic Forest remaining in the country (Rezende et al. 2018). For the delimitation of the study area, we used the Brazilian biomes map (IBGE - [http://downloads.ibge.gov.br/downloads\\_geociencias.htm](http://downloads.ibge.gov.br/downloads_geociencias.htm)).

## Geographic distribution and occurrence records

In this study, we used the distributional ranges of 25 primate species to calculate, for each species, the total distribution area and the area inside the biome (Table S1). We then obtained the proportion of the distribution of each species within the biome. We considered all species that have more than 3 million ha and/or more than 50% of the area of their distribution within the Brazilian Atlantic Forest (Figure S1).

The primate occurrence records used to construct habitat suitability models were compiled from published literature indexed in *Web of Science* and *SciELO* and published in the specialised journals *Neotropical Primates* and *Checklist*, from January 2000 to December 2015. These occurrences records complemented another database described and used by Pinto & Grelle (2009). We used genus name (*Alouatta*, *Brachyteles*, *Callicebus*, *Callithrix* and *Leontopithecus*) as the keyword in Web of Science and SciELO searches. Specifically for the genus *Sapajus* we used the keywords *Cebus* and *Sapajus*, considering the recent taxonomic update for *Cebus* (Alfaro et al., 2012). In order to stimulate the *Open Science* philosophy, we made all these data available for the entire scientific and non-scientific community at ATLANTIC SERIES data paper (Culot et al., 2019).

We performed the taxonomic reclassification when necessary, following IUCN (2016) and Rylands & Mittermeier (2009). Subsequently, all occurrence records data were examined for spatial location. Records located within the geographical distribution of the species (IUCN, 2016) were considered valid. Occurrence records located outside the geographic distribution of the species (IUCN, 2016) were considered valid only if: a) were reported in more than one publication with at least one direct record (capture or visualization) with the primate as study object; or b) the authors explicitly reported a geographic expansion of the species distribution.

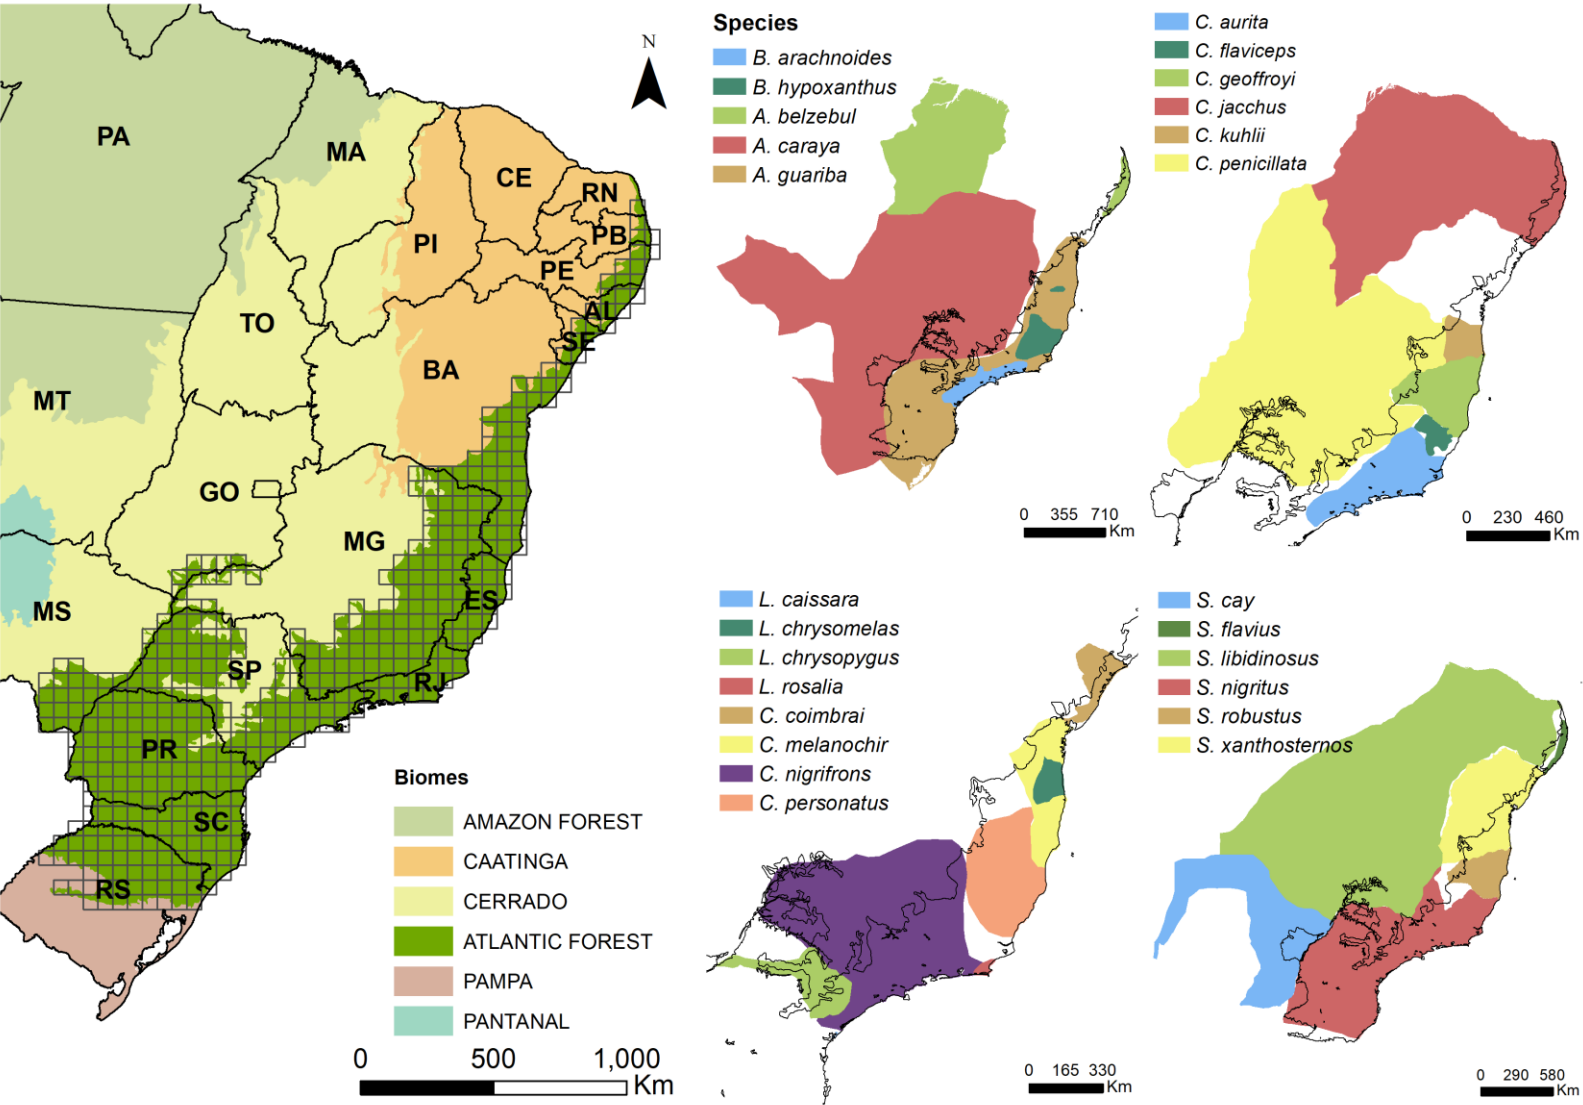

**Fig. S1** Grid with 0.5° latitude/longitude grains over the Brazilian Atlantic Forest and primates distribution according to IUCN (2016). Atlantic Forest according to IBGE biomes map. Limits of the Brazilian states: MT – Mato Grosso, PA - Pará, TO – Tocantins, MA – Maranhão, PI – Piauí, CE – Ceará, RN – Rio Grande do Norte, PB – Paraíba, PE – Pernambuco, AL – Alagoas, SE – Sergipe, BA – Bahia, GO – Goiás, MG – Minas Gerais, ES – Espírito Santo, RJ – Rio de Janeiro, SP – São Paulo, MS – Mato Grosso do Sul, PR – Paraná, SC – Santa Catarina, and RS – Rio Grande do Sul.

**Table S1** Primate species included in this study. Name of species (Species); total area of species' extent of occurrence according to IUCN shapefile (Total area (ha)); area and proportion of species extent of occurrence that intersects with the Atlantic Forest biome (this biome was defined according to the map of application of the Atlantic Forest Law - Law - or according to the Brazilian biome boundary map - IBGE); criteria for inclusion of the species in the study (inclusion criteria: > 3 thousand - species that has more than 3 million ha of its distribution in the biome, and/or > 50% - species with more than 50% of its distribution in the biome); IUCN status of each species.

| Species                           | Total area (ha) | Area in the Atlantic Forest |       |            |       | Inclusion criteria |          | IUCN status |
|-----------------------------------|-----------------|-----------------------------|-------|------------|-------|--------------------|----------|-------------|
|                                   |                 | Law (ha)                    | % Law | IBGE (ha)  | %IBGE | > 3 thousand       | > 50 %   |             |
| <i>Alouatta belzebul</i>          | 86,670,802      | 3,455,937                   | 4     | 3,647,687  | 4     | Law/IBGE           |          | VU          |
| <i>Alouatta caraya</i>            | 306,416,453     | 27,165,167                  | 9     | 17,566,815 | 6     | Law/IBGE           |          | NT          |
| <i>Alouatta guariba</i>           | 107,659,621     | 91,113,861                  | 85    | 89,717,964 | 83    | Law/IBGE           | Law/IBGE | NT          |
| <i>Brachyteles arachnoides</i>    | 8,627,440       | 8,315,073                   | 96*   | 8,521,713  | 99*   | Law/IBGE           | Law/IBGE | EN          |
| <i>Brachyteles hypoxanthus</i>    | 9,665,731       | 9,602,523                   | 99*   | 9,657,511  | 100   | Law/IBGE           | Law/IBGE | CR          |
| <i>Callicebus coimbrai</i>        | 3,858,502       | 1,896,609                   | 49    | 2,043,057  | 53    |                    | IBGE     | EN          |
| <i>Callicebus melanochir</i>      | 9,986,641       | 8,575,852                   | 86    | 8,845,902  | 89    | Law/IBGE           | Law/IBGE | VU          |
| <i>Callicebus nigrifrons</i>      | 49,058,140      | 25,377,625                  | 52    | 24,913,369 | 51    | Law/IBGE           | Law/IBGE | NT          |
| <i>Callicebus personatus</i>      | 14,297,270      | 13,902,012                  | 97    | 13,980,314 | 98    | Law/IBGE           | Law/IBGE | VU          |
| <i>Callithrix aurita</i>          | 15,961,278      | 15,619,146                  | 98    | 15,908,611 | 100   | Law/IBGE           | Law/IBGE | VU          |
| <i>Callithrix flaviceps</i>       | 2,473,247       | 2,473,247                   | 100   | 2,473,247  | 100   |                    | Law/IBGE | EN          |
| <i>Callithrix geoffroyi</i>       | 12,496,725      | 11,058,322                  | 88    | 11,198,295 | 90    | Law/IBGE           | Law/IBGE | LC          |
| <i>Callithrix jacchus</i>         | 94,336,346      | 8,384,616                   | 9     | 3,995,691  | 4     | Law/IBGE           |          | LC          |
| <i>Callithrix kuhlii</i>          | 4,570,134       | 4,066,651                   | 89    | 4,132,885  | 90    | Law/IBGE           | Law/IBGE | NT          |
| <i>Callithrix penicillata</i>     | 130,979,641     | 20,973,384                  | 16    | 14,770,473 | 11    | Law/IBGE           |          | LC          |
| <i>Leontopithecus caissara</i>    | 33,496          | 24,827                      | 74*   | 32,611     | 97*   |                    | Law/IBGE | CR          |
| <i>Leontopithecus chrysomelas</i> | 2,018,963       | 1,968,710                   | 98*   | 2,018,878  | 100   |                    | Law/IBGE | EN          |
| <i>Leontopithecus chrysopygus</i> | 6,367,099       | 3,828,615                   | 60    | 3,800,176  | 60    | Law/IBGE           | Law/IBGE | EN          |

|                               |             |            |     |            |     |          |          |    |
|-------------------------------|-------------|------------|-----|------------|-----|----------|----------|----|
| <i>Leontopithecus rosalia</i> | 399,052     | 337,307    | 85* | 393,699    | 99* |          | Law/IBGE | EN |
| <i>Sapajus cay</i>            | 62,090,538  | 5,710,266  | 9   | 4,806,174  | 8   | Law/IBGE |          | LC |
| <i>Sapajus flavius</i>        | 3,891,765   | 3,508,166  | 90  | 3,777,984  | 97  | Law/IBGE | Law/IBGE | CR |
| <i>Sapajus libidinosus</i>    | 261,254,845 | 10,890,264 | 4   | 3,149,014  | 1   | Law/IBGE |          | LC |
| <i>Sapajus nigritus</i>       | 87,980,012  | 72,453,624 | 82  | 72,732,782 | 83  | Law/IBGE | Law/IBGE | NT |
| <i>Sapajus robustus</i>       | 11,992,192  | 10,565,957 | 88  | 10,699,244 | 89  | Law/IBGE | Law/IBGE | EN |
| <i>Sapajus xanthosternos</i>  | 46,659,595  | 17,588,623 | 38  | 12,018,094 | 26  | Law/IBGE |          | CR |

\* These species are endemic to the Atlantic Forest. Due to the spatial congruence of the shapefiles used (IUCN distributions and Atlantic Forest limits), species' area in the biome was different from the species' total area. All shapefiles were in the same spatial projection.

LC – Least concern; NT – Near Threatened; VU – Vulnerable; EN – Endangered; CR – Critically Endangered.

## Environmental data

A total of 19 bioclimatic temperature and precipitation variables and altitude were obtained from WorldClim - Global Climate Data database (Hijmans et al., 2005) (Table S2). These bioclimatic data for the current time were constructed using the average of the data collected between 1960 and 1990, and for 2050 considered the average estimates of the time interval between 2041 and 2060. The climate and precipitation variables were obtained in the resolution of 2.5 minutes ( $\sim 5\text{km}^2$ ). The original altitude resolution is 30 seconds ( $\sim 1\text{km}^2$ ), and it was resized to the same resolution of the bioclimatic variables for modelling purposes.

Bioclimatic data for the future are available considering different Global Climate Model (GCM) associated with the Representative Concentration Pathways (RCPs, which were built on different scenarios of greenhouse gas emissions). Greenhouse gas emissions is expected to be reduced in two optimistic scenarios. RCP 2.6 considers the greenhouse gas emissions peak between 2010 and 2020, and it subsequently declines substantially, and RCP 4.5 predicts the greenhouse gas emissions peak in 2040, and it is expected to decline soon (IPCC, 2014). Pessimistic scenarios are also expected. RCP 6.0 is a scenario with high greenhouse gas emissions emission with a peak occurring in 2080 and only then should emissions be reduced, while the more catastrophic RCP 8.5 scenario predicts greenhouse gas emissions increase throughout 21<sup>st</sup> century (IPCC, 2014). In this study, we used these four RCPs associated with eight different GCMs: BCC-CSM1-1, CCSM4, GISS-E2-R, HadGEM2-AO, HadGEM2-ES, IPSL-CM5A-LR, MRI-CGCM3 and NorESM1-M.



**Table S2** Bioclimatic variables of temperature and precipitation, and altitude, obtained from the database Worldclim - Global Climate Data (<http://www.worldclim.com>). Variable Code (Cod.) and variable name (Variables).

| <b>Cod.</b> | <b>Variables</b>                                           |
|-------------|------------------------------------------------------------|
| Alt         | Altitude                                                   |
| bio1        | Annual Mean Temperature                                    |
| bio2        | Mean Diurnal Range (Mean of monthly (max temp - min temp)) |
| bio3        | Isothermality (BIO2/BIO7) (* 100)                          |
| bio4        | Temperature Seasonality (standard deviation * 100)         |
| bio5        | Max Temperature of Warmest Month                           |
| bio6        | Min Temperature of Coldest Month                           |
| bio7        | Temperature Annual Range (BIO5-BIO6)                       |
| bio8        | Mean Temperature of Wettest Quarter                        |
| bio9        | Mean Temperature of Driest Quarter                         |
| bio10       | Mean Temperature of Warmest Quarter                        |
| bio11       | Mean Temperature of Coldest Quarter                        |
| bio12       | Annual Precipitation                                       |
| bio13       | Precipitation of Wettest Month                             |
| bio14       | Precipitation of Driest Month                              |
| bio15       | Precipitation Seasonality (Coefficient of Variation)       |
| bio16       | Precipitation of Wettest Quarter                           |
| bio17       | Precipitation of Driest Quarter                            |
| bio18       | Precipitation of Warmest Quarter                           |
| bio19       | Precipitation of Coldest Quarter                           |

## Current and future primate suitability models

The modelling background area to build the habitat suitability models was defined based on the coverage of occurrence records of all species used in the study. We randomly selected 10,000 pixels to calculate the variance inflation factor (VIF; Quinn & Keough, 2002) of variables and removed those with VIF higher than three (Zuur et al., 2010). The following variables were maintained: mean diurnal range (bio2), isothermality (bio3), mean temperature of wettest quarter (bio8), precipitation of wettest month (bio13), precipitation seasonality (bio15) precipitation of warmest quarter (bio18) and precipitation of coldest quarter (bio19). For each species, only one occurrence record in each pixel of the environmental layer was maintained, to minimize overfitting due to sampling bias.

We used the maximum entropy algorithm Maxent 3.3.3k (Elith et al., 2011; Phillips et al., 2006) to generate habitat suitability models (Table S3). In the construction of habitat suitability models, we used 10 values of regularization multiplier (RM - between 0.5 and 5, in increments of 0.5) and six types of feature class (FC - L, LQ, H, LQH, LQHP and LQHPT, where L = linear, Q = quadratic, H = hinge, P = product and T = threshold). For each species we compared the performance of 60 models, using the Akaike Information Criterion corrected (AICc) associated with acceptable values of the area under the ROC curve (AUC - Area Under the ROC Curve,  $> 0.75$ ). AIC reflects the complexity and model fit, and lower values of AIC are expected to the best models (Burnham and Anderson, 2004; Muscarella et al., 2014). The AIC has demonstrated better performance when compared to AUC in selection of models (Warren and Seifert, 2011). The best model for each species, according to those criteria, is represented in the Table S3. The data partition method of test and training data depended on the number of occurrence data. 'block' was used for species with more

than 25 event locations and 'k-1 Jackknife' for species with less than 25 points (Muscarella et al., 2014; Pearson et al., 2007; Shcheglovitova and Anderson, 2013; Wenger and Olden, 2012).

The models adjusted in the present were spatially projected into the future (2050), generating surfaces of environmental suitability of each species in the future. For each greenhouse gas emissions scenario (RCP: 2.6, 4.5, 6.0 and 8.5) a consensus average model was generated from the eight different GCMs (BCC-CSM1-1, CCSM4, GISS-E2-R, HadGEM2-AO, HadGEM2-ES, IPSL-CM5A-LR, MRI-CGCM3 and NorESM1-M). The consensus models and its variability can be observed in Fig. S2. For each species, we joined the IUCN extent with 50 km buffer around occurrence data, and clipped the models in this space.

The five final suitability maps for each species, one current and four future scenarios, were converted into binary maps using the 10 percentile training presence threshold, which is indicated when using different data sources, due to possible inaccuracies of georeferencing (Barros et al., 2012).

We used the R software (R Core Team, 2017), the `vif_func` script (available at [https://github.com/oliveirab/R-codes/blob/master/vif\\_func.R](https://github.com/oliveirab/R-codes/blob/master/vif_func.R)) to calculate VIF, the 'ENMeval' packages for selection of the parameters of the suitability models by AICc and AUC criteria, and 'dismo' package to implement MaxEnt algorithm.

**Table S3** Parameters used in the selection of suitability models: species name (Species), regularization multiplier (RM), feature classes (FC), the values area under the ROC curve (AUC), variables (Variables) and number of points (Nº. points). The name of the variables can be observed in Table S2.

| Species                           | RM  | FC    | AUC  | Variables                                    | Nº points |
|-----------------------------------|-----|-------|------|----------------------------------------------|-----------|
| <i>Alouatta belzebul</i>          | 4   | LQHP  | 0.93 | Bio2, Bio3, Bio15, Bio18, Bio19              | 24        |
| <i>Alouatta caraya</i>            | 1.5 | LQHP  | 0.82 | Bio2, Bio3, Bio8, Bio13, Bio15, Bio18, Bio19 | 74        |
| <i>Alouatta guariba</i>           | 3   | LQH   | 0.93 | Bio2, Bio3, Bio8, Bio13, Bio15, Bio18, Bio19 | 250       |
| <i>Brachyteles arachnoides</i>    | 1.5 | H     | 0.98 | Bio2, Bio3, Bio8, Bio15, Bio18, Bio19        | 47        |
| <i>Brachyteles hypoxanthus</i>    | 1.5 | LQHP  | 0.98 | Bio2, Bio3, Bio8, Bio13, Bio15, Bio18, Bio19 | 37        |
| <i>Callicebus coimbrai</i>        | 1.5 | LQ    | 0.97 | Bio2, Bio3, Bio8, Bio13, Bio15, Bio18, Bio19 | 78        |
| <i>Callicebus melanochir</i>      | 1.5 | LQ    | 0.99 | Bio2, Bio3, Bio8, Bio13, Bio15, Bio19        | 12        |
| <i>Callicebus nigrifrons</i>      | 1.5 | LQHP  | 0.99 | Bio2, Bio3, Bio8, Bio15, Bio18, Bio19        | 47        |
| <i>Callicebus personatus</i>      | 0.5 | LQ    | 0.98 | Bio2, Bio3, Bio13, Bio15, Bio18, Bio19       | 22        |
| <i>Callithrix aurita</i>          | 1   | LQ    | 0.98 | Bio2, Bio3, Bio8, Bio13, Bio15, Bio18, Bio19 | 62        |
| <i>Callithrix flaviceps</i>       | 1   | LQ    | 0.99 | Bio2, Bio3, Bio8, Bio13, Bio15, Bio18, Bio19 | 22        |
| <i>Callithrix geoffroyi</i>       | 0.5 | LQ    | 0.91 | Bio2, Bio3, Bio8, Bio13, Bio15, Bio18, Bio19 | 54        |
| <i>Callithrix jacchus</i>         | 0.5 | LQ    | 0.87 | Bio2, Bio3, Bio8, Bio13, Bio15, Bio18, Bio19 | 31        |
| <i>Callithrix kuhlii</i>          | 0.5 | L     | 0.99 | Bio2, Bio3, Bio8, Bio13, Bio15, Bio19        | 17        |
| <i>Callithrix penicillata</i>     | 0.5 | LQ    | 0.93 | Bio2, Bio3, Bio8, Bio13, Bio15, Bio18, Bio19 | 25        |
| <i>Leontopithecus caissara</i>    | 4   | H     | 1.00 | Bio2, Bio3, Bio8, Bio13, Bio18               | 14        |
| <i>Leontopithecus chrysomelas</i> | 4.5 | LQHPT | 0.95 | Bio2, Bio3, Bio8, Bio13, Bio15, Bio18, Bio19 | 107       |
| <i>Leontopithecus chrysopygus</i> | 0.5 | LQ    | 0.97 | Bio3, Bio8, Bio13, Bio15, Bio18, Bio19       | 32        |
| <i>Leontopithecus rosalia</i>     | 4   | LQHP  | 0.97 | Bio2, Bio3, Bio8, Bio13, Bio15, Bio18, Bio19 | 37        |
| <i>Sapajus cay</i>                | 1.5 | LQ    | 0.96 | Bio2, Bio3, Bio8, Bio13, Bio15, Bio18, Bio19 | 17        |
| <i>Sapajus flavius</i>            | 1.5 | LQ    | 0.99 | Bio2, Bio13, Bio15, Bio18, Bio19             | 12        |
| <i>Sapajus libidinosus</i>        | 4.5 | LQ    | 0.78 | Bio3, Bio15, Bio19                           | 29        |
| <i>Sapajus nigritus</i>           | 2   | LQH   | 0.93 | Bio2, Bio3, Bio8, Bio13, Bio15, Bio18, Bio19 | 225       |

|                              |     |     |      |                                              |    |
|------------------------------|-----|-----|------|----------------------------------------------|----|
| <i>Sapajus robustus</i>      | 0.5 | LQ  | 0.96 | Bio2, Bio3, Bio8, Bio13, Bio15, Bio18, Bio19 | 28 |
| <i>Sapajus xanthosternos</i> | 2.5 | LQH | 0.87 | Bio2, Bio3, Bio8, Bio13, Bio15, Bio18, Bio19 | 52 |

---

*Alouatta belzebul*

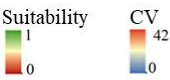

RCP 2.6

RCP 8.5

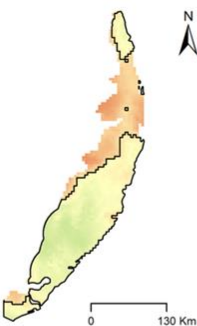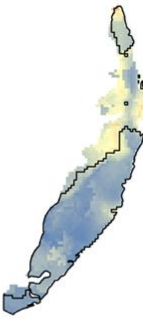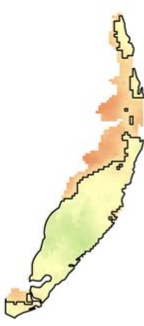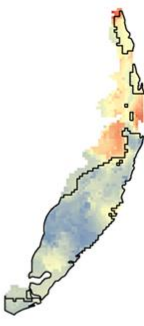

*Alouatta caraya*

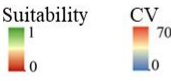

RCP 2.6

RCP 8.5

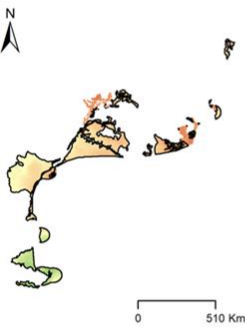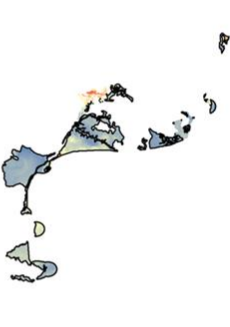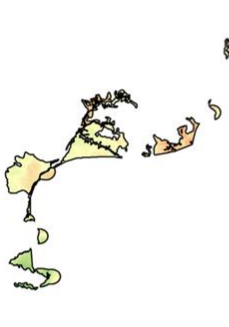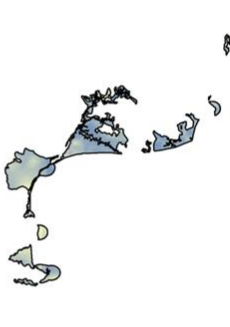

*Alouatta guariba*

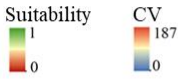

RCP 2.6

RCP 8.5

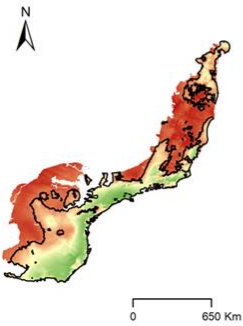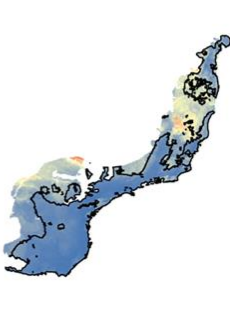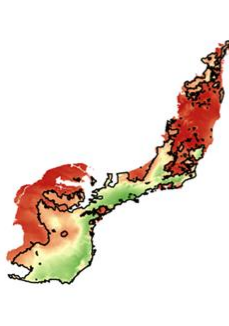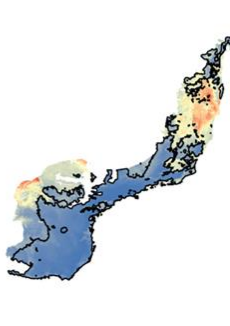

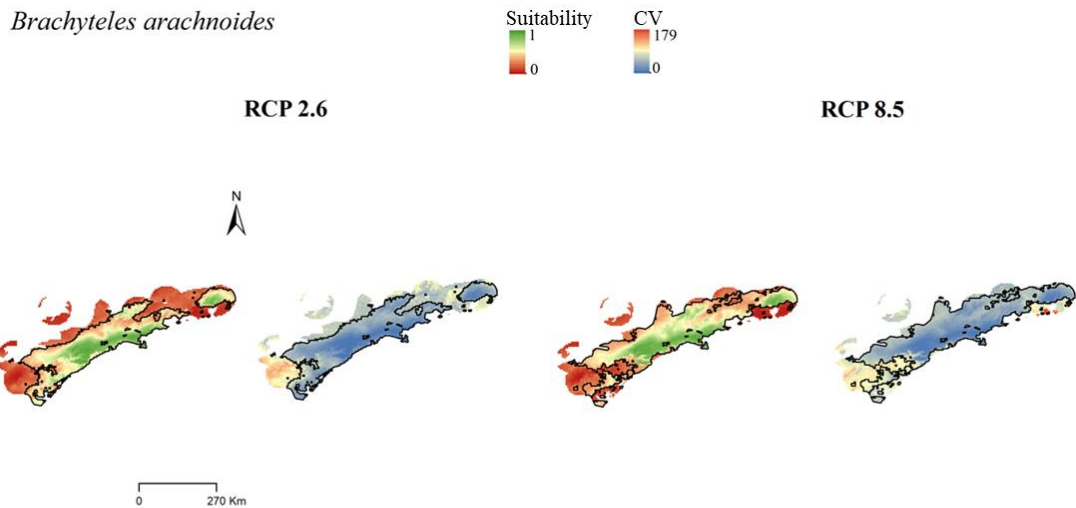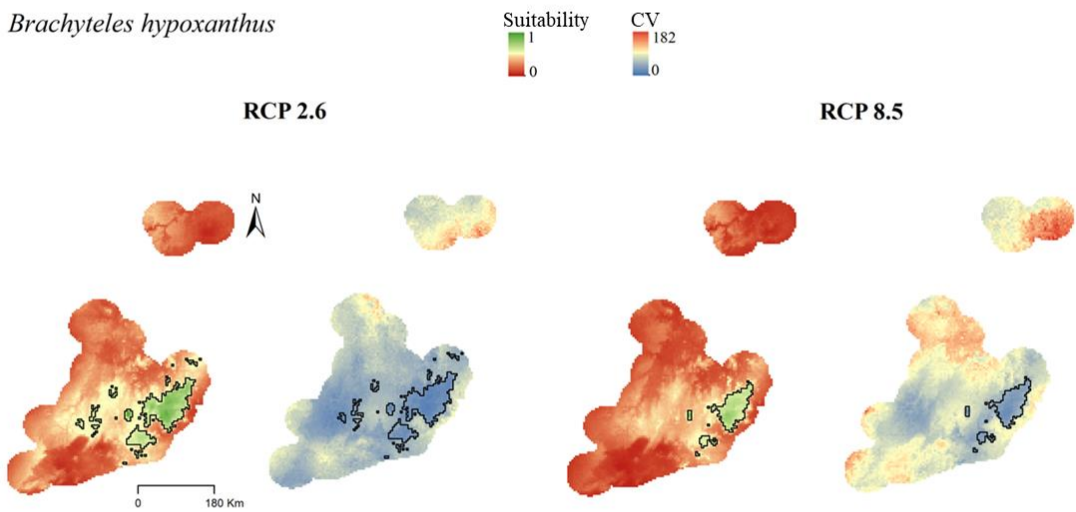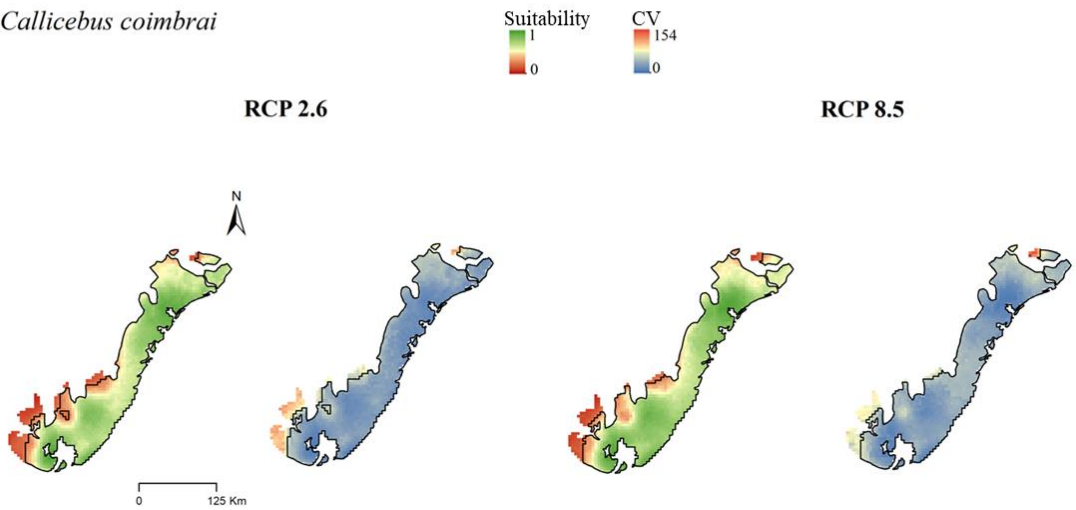

*Callicebus melanochir*

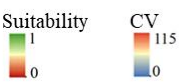

RCP 2.6

RCP 8.5

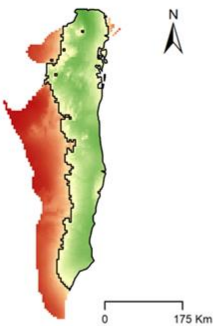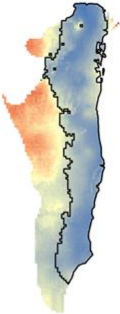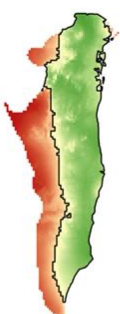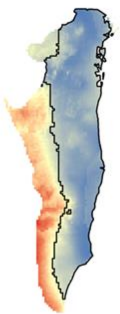

*Callicebus nigrifrons*

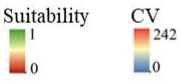

RCP 2.6

RCP 8.5

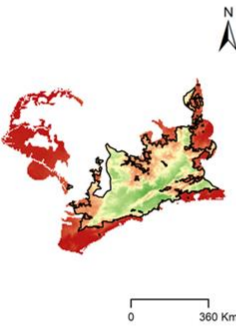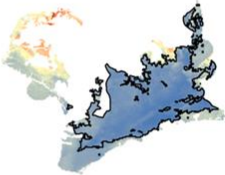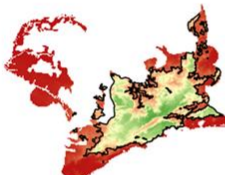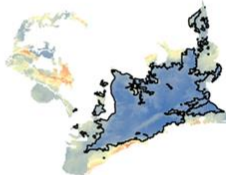

*Callicebus personatus*

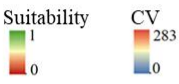

RCP 2.6

RCP 8.5

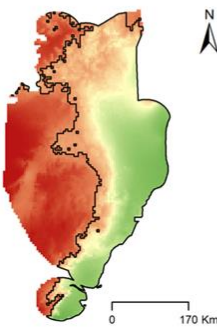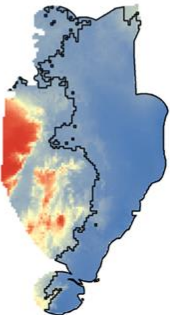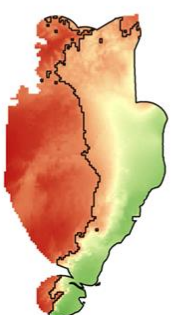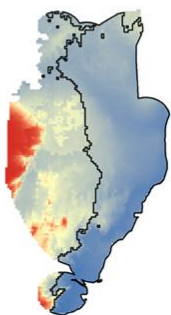



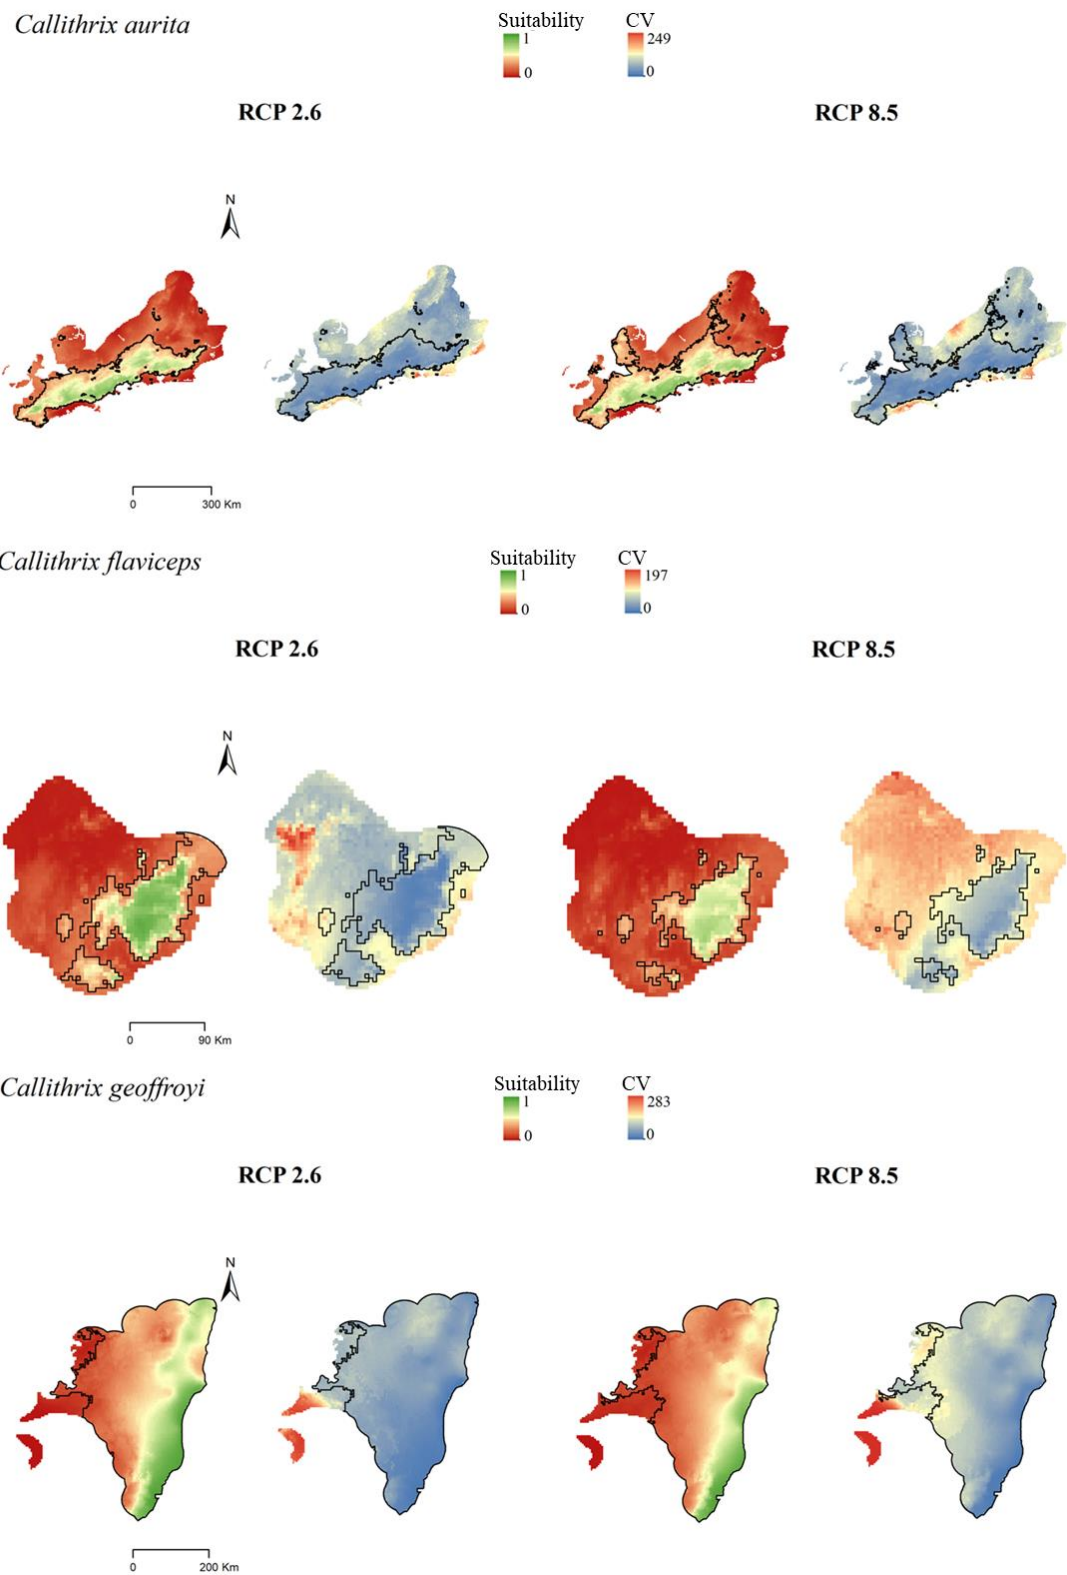

*Callithrix jacchus*

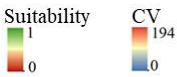

RCP 2.6

RCP 8.5

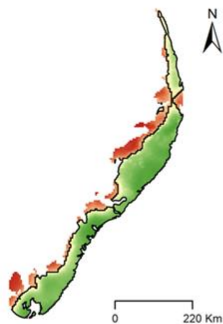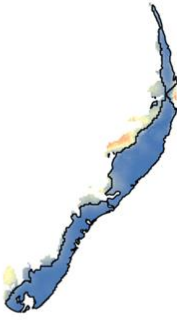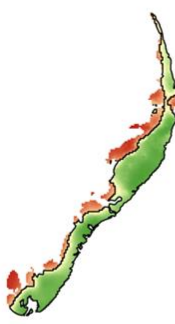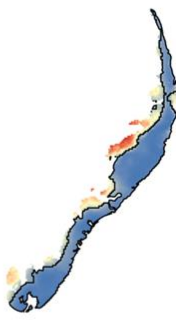

*Callithrix kuhlii*

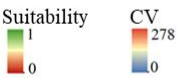

RCP 2.6

RCP 8.5

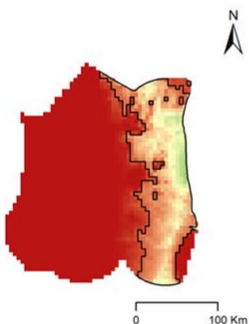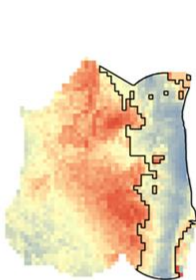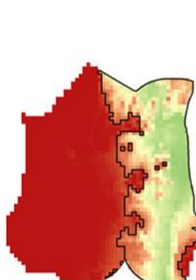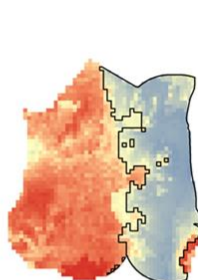

*Callithrix penicillata*

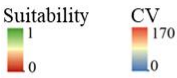

RCP 2.6

RCP 8.5

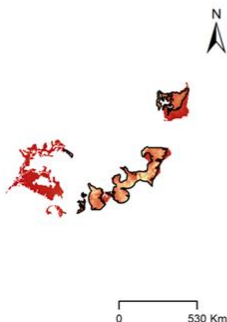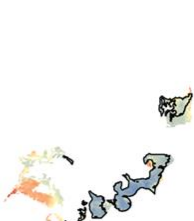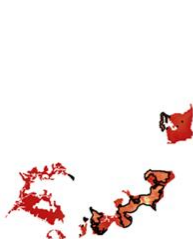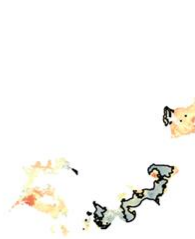

*Leontopithecus caissara*

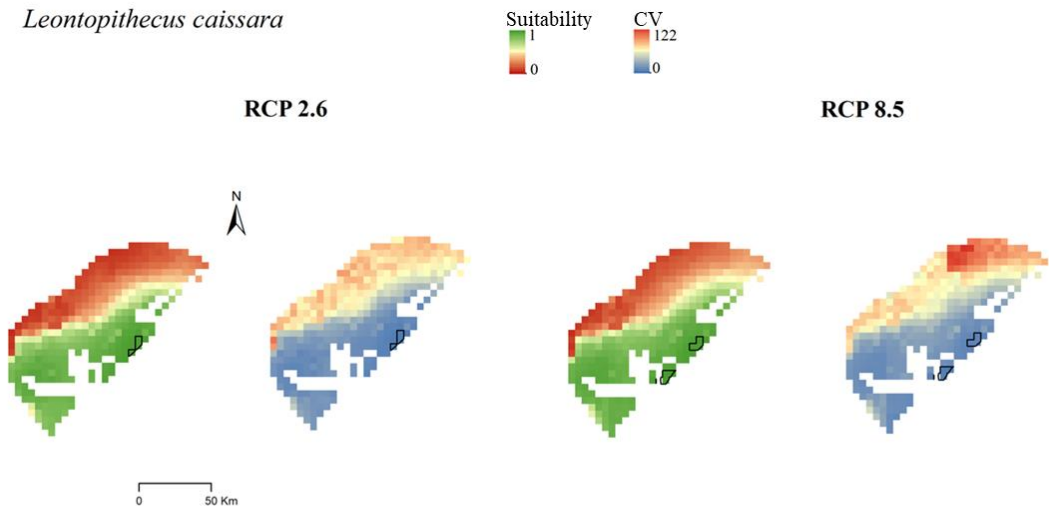

*Leontopithecus chrysomelas*

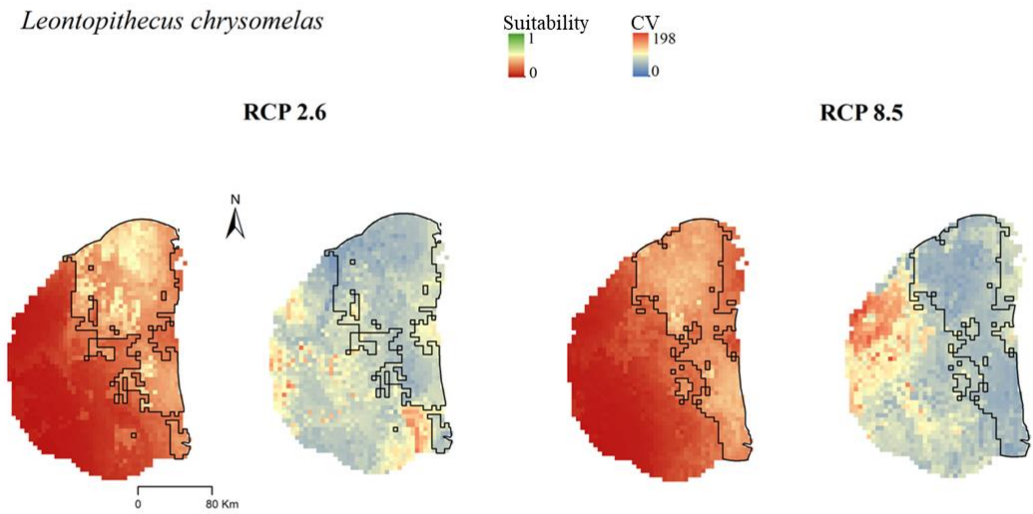

*Leontopithecus chrysopygus*

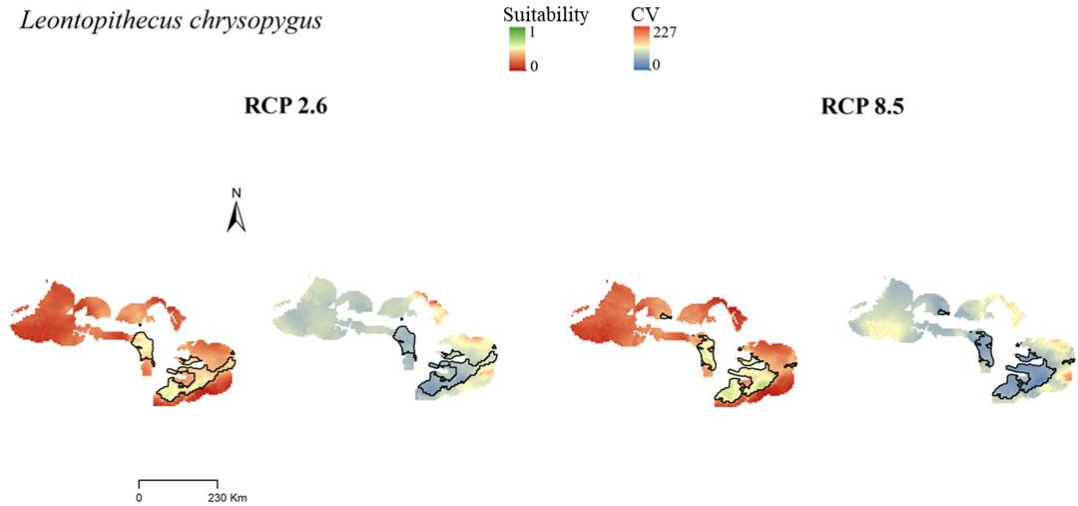

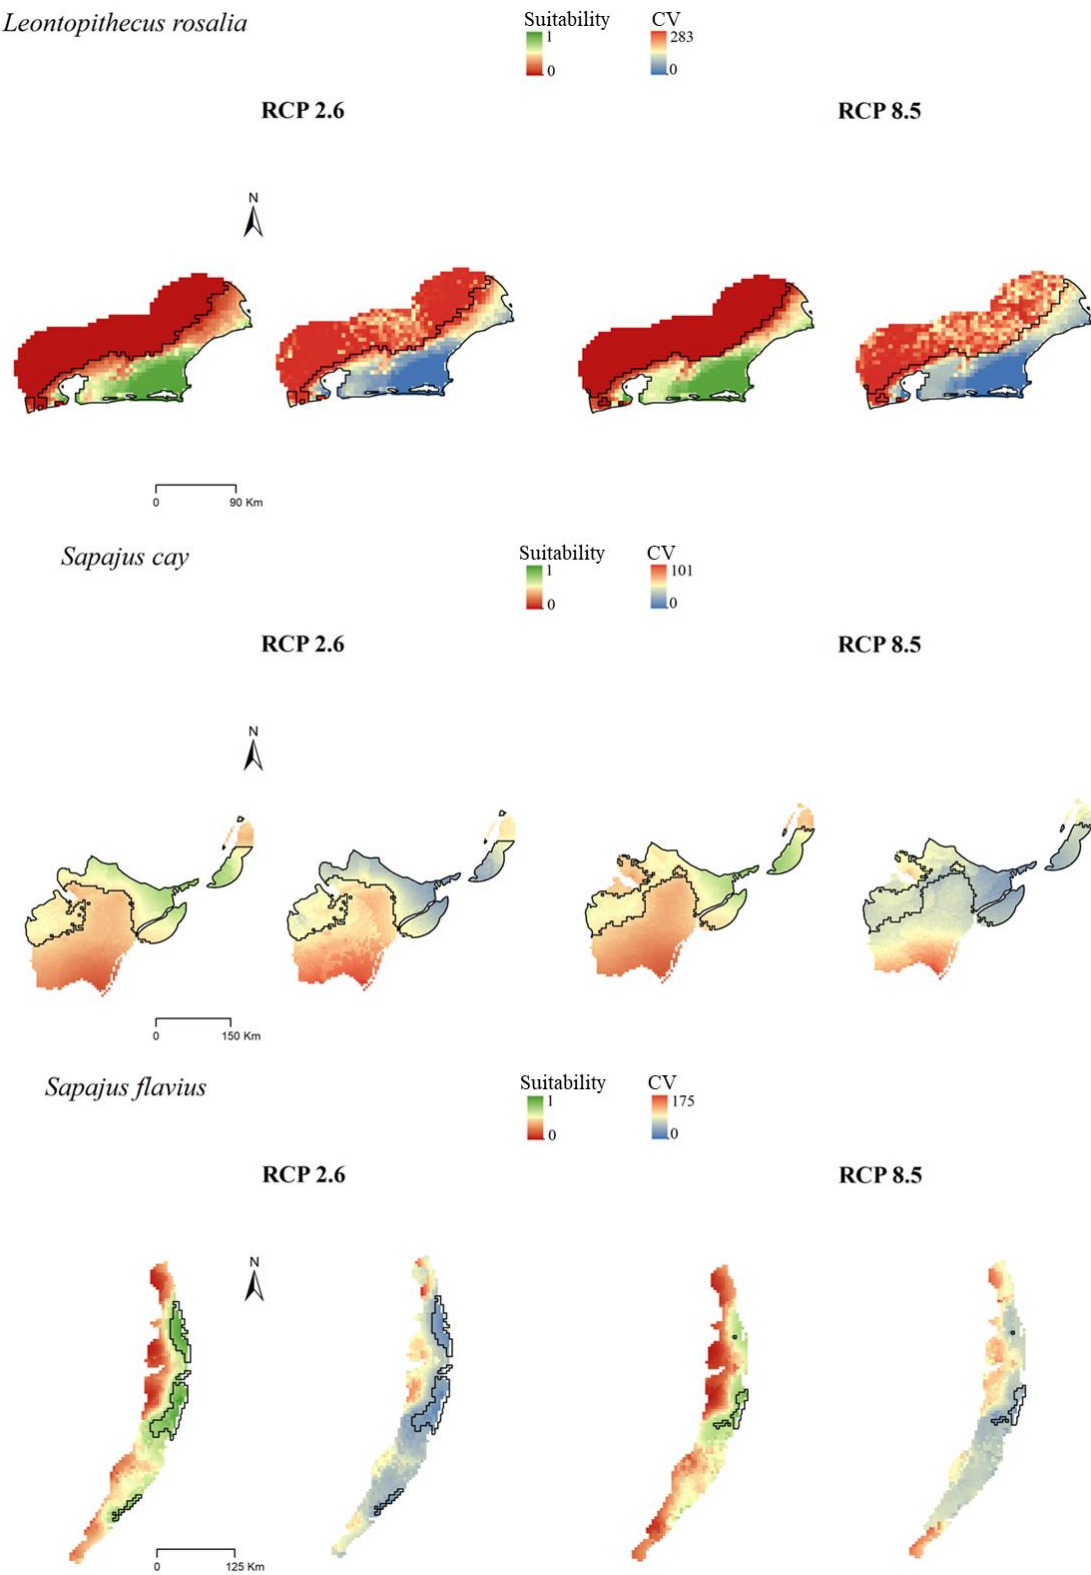

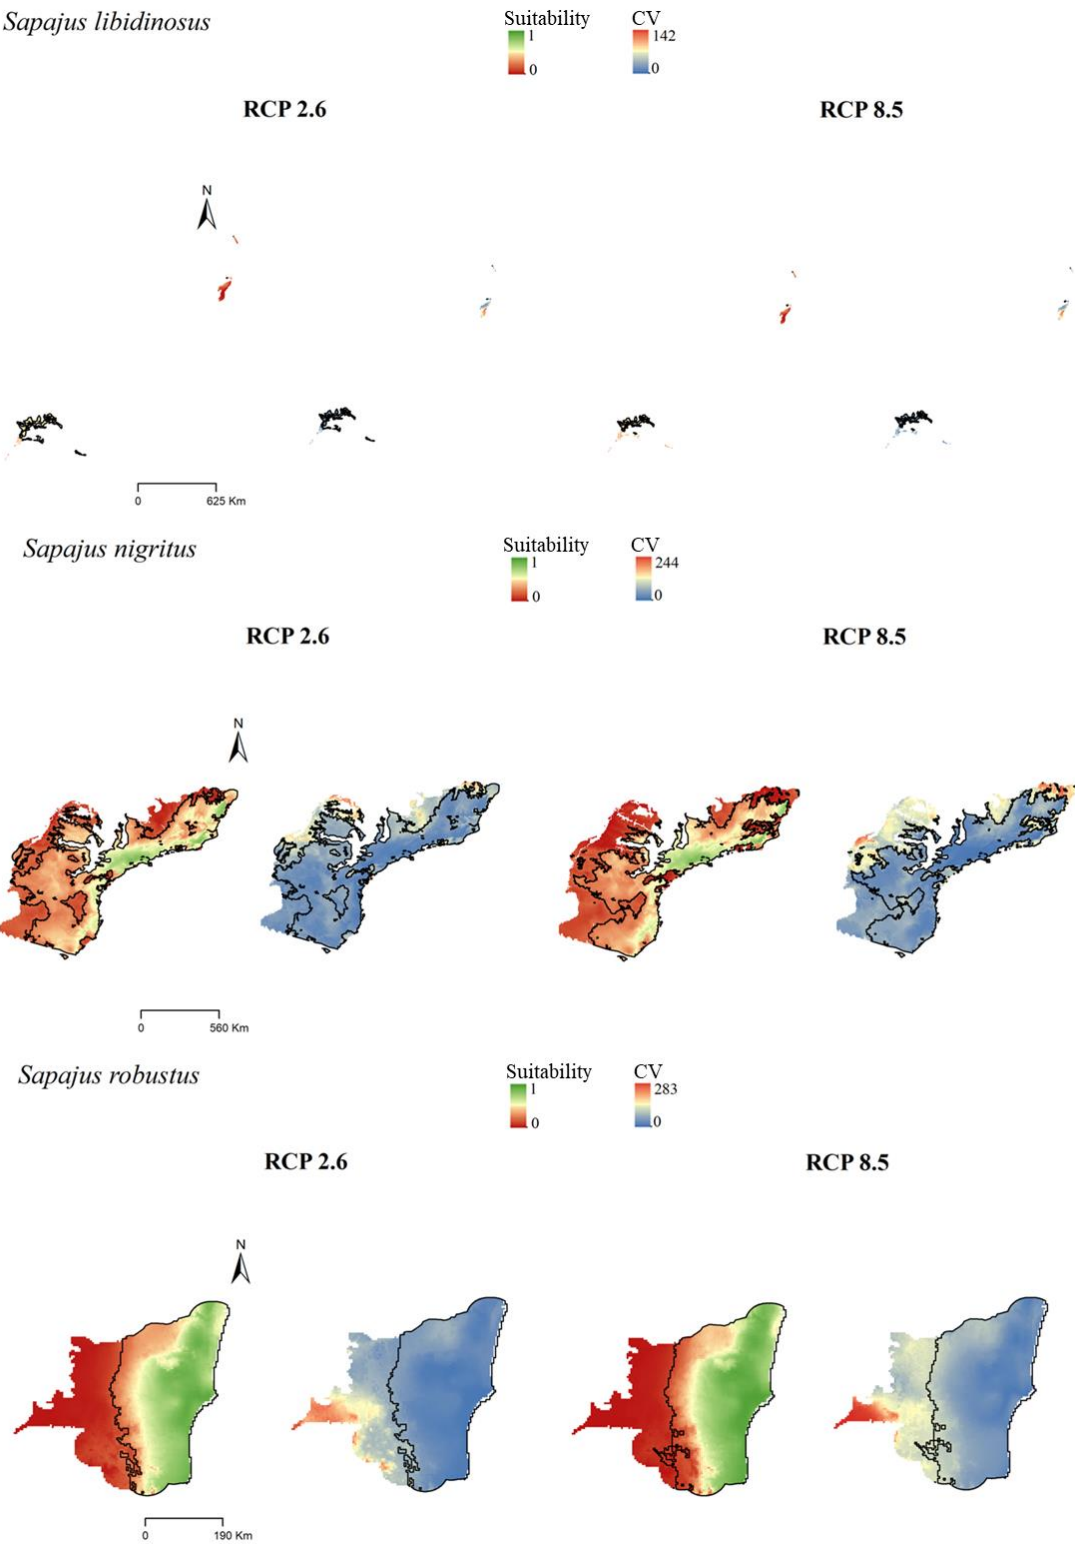

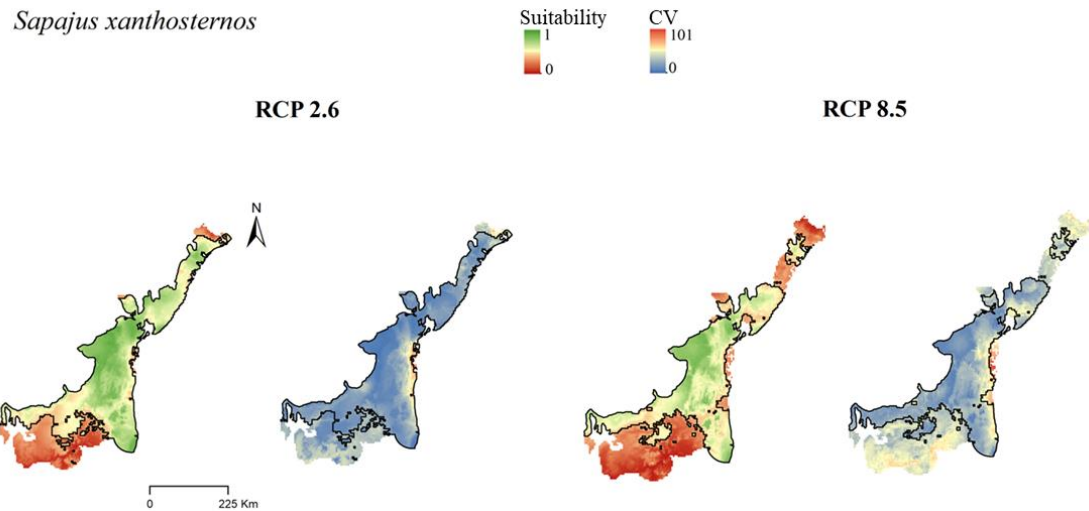

**Fig. S2** Habitat suitability consensus models of each species of primate of the Atlantic Forest in the optimistic (RCP 2.6) and pessimistic (RCP 8.5) scenarios of greenhouse gases emissions. Suitability maps represents the average and CV represents coefficient of variation among models. The black polygon represents the '10 percentile training presence threshold', used to determine the distribution range of the species.

## **Spatial and temporal primate diversity**

Spatial and temporal patterns of alpha and beta diversity were calculated for the present and future of the distribution of the Atlantic Forest primates.

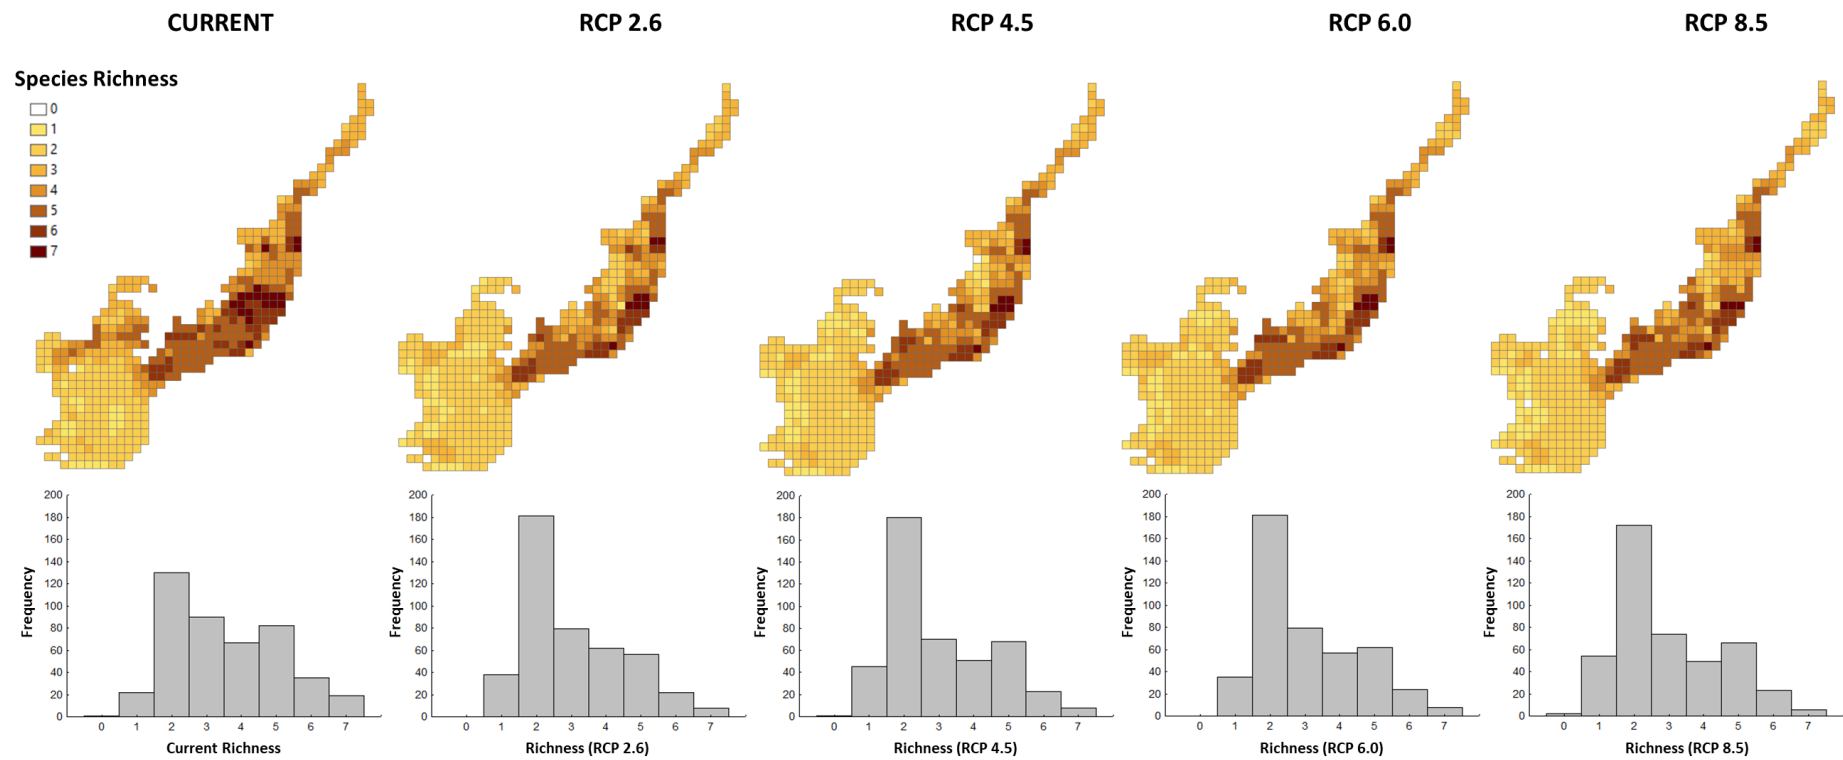

**Fig. S3** Primate richness in current (CURRENT) and future scenarios of climate changes in the Brazilian Atlantic Forest. Optimistic (RCP 2.6), optimistic stabilisation (RCP 4.5), pessimistic stabilisation (RCP 6.0) and pessimistic (8.5 PCR) scenarios.



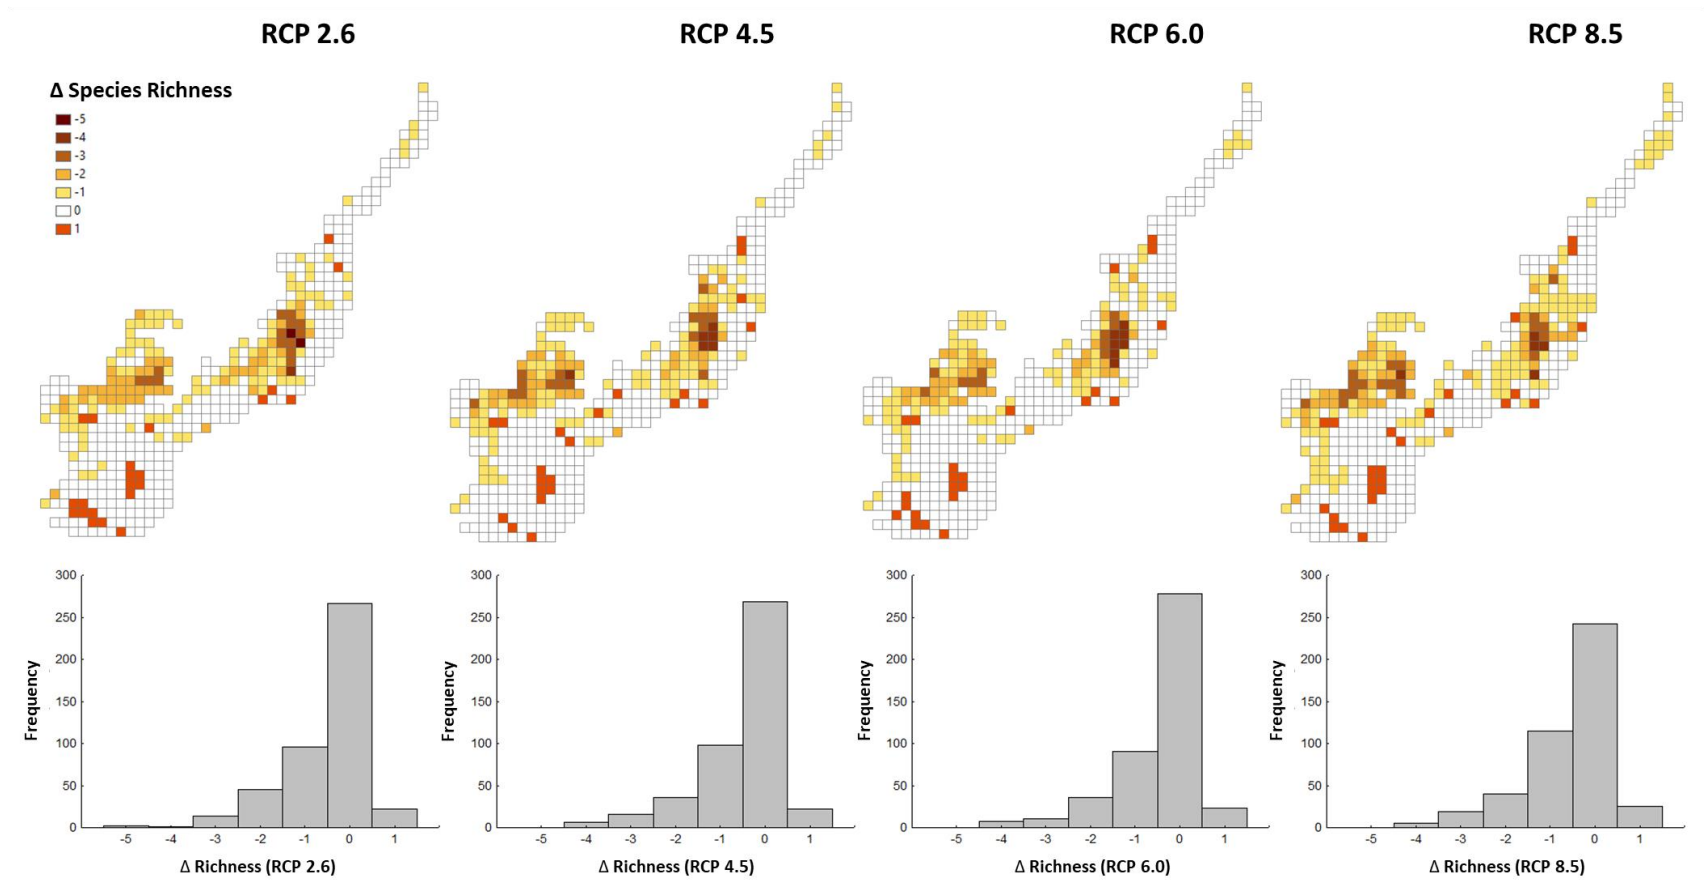

**Fig. S4** Difference between the future and current primate richness in the Atlantic Forest. Optimistic (RCP 2.6), stabilisation optimistic (RCP 4.5), stabilisation pessimistic (RCP 6.0) and pessimistic (RCP 8.5) scenarios. Negative and positive values represent loss and gain of species, respectively.

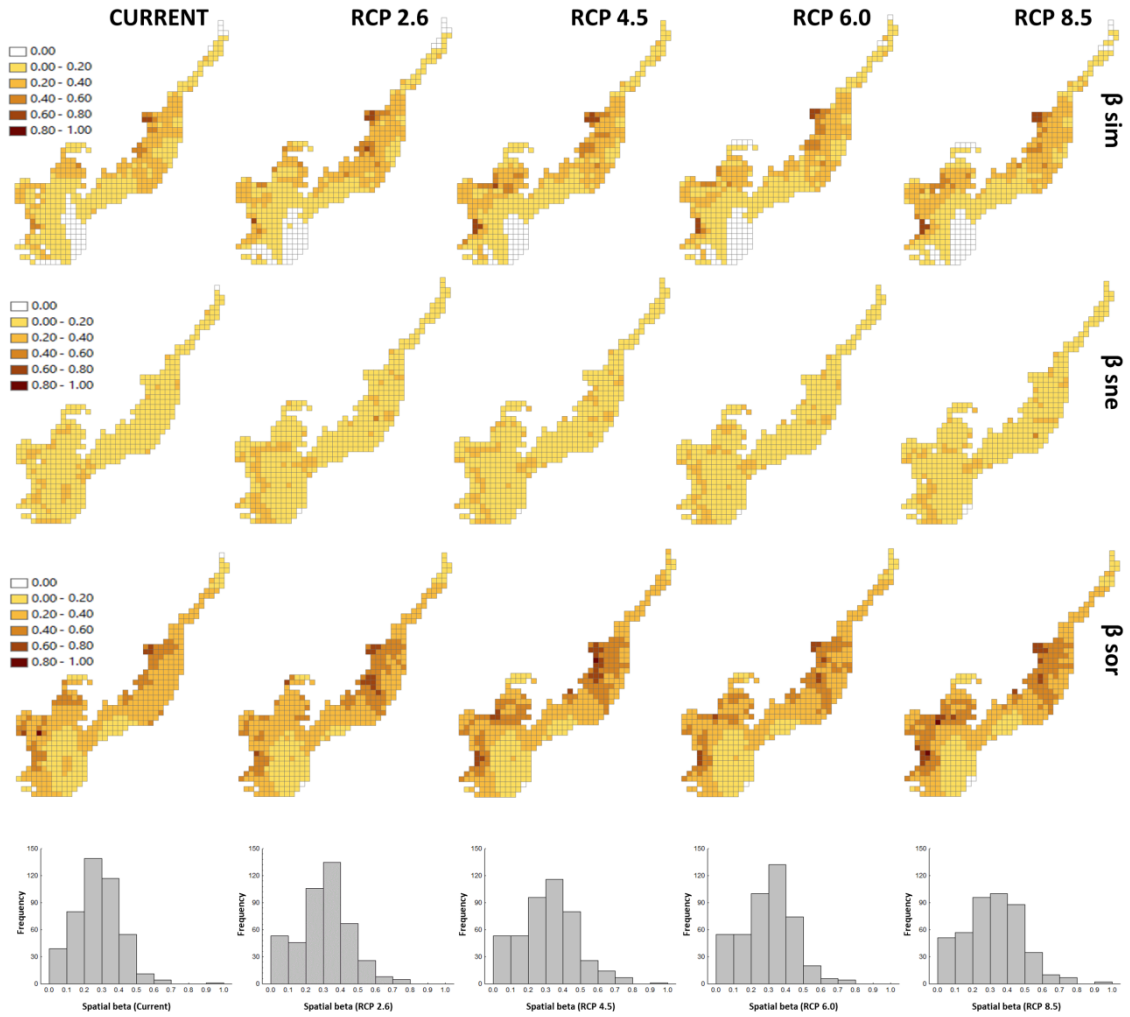

**Fig. S5** Spatial beta diversity of primates in the Atlantic Forest in current and future scenarios. Optimistic (RCP 2.6), optimistically stabilisation (RCP 4.5), pessimistic stabilisation (RCP 6.0) and pessimistic (RCP 8.5) scenarios. The beta diversity ( $\beta_{sor}$ ) was fractionated in turnover ( $\beta_{sim}$ ) and nestedness ( $\beta_{sne}$ ). Histograms represent the frequency values of  $\beta_{sor}$  for each scenario.

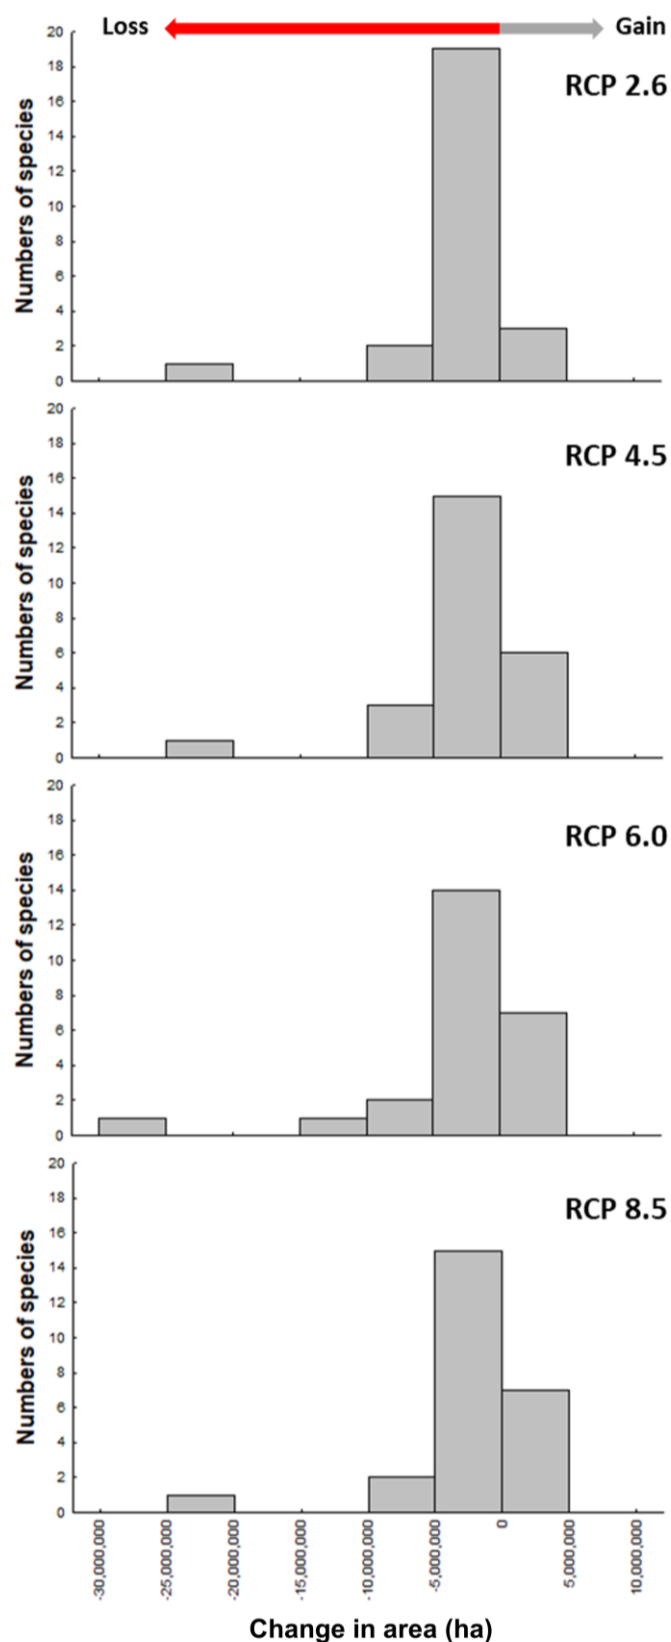

**Fig. S6** Histogram of the difference in the distribution area (area of the future distribution - area of current distribution) of primate species in the Atlantic Forest in future scenarios. Optimistic (RCP 2.6), optimistic stabilisation (RCP 4.5), pessimistic stabilisation (RCP 6.0) and pessimistic (RCP 8.5) scenarios.

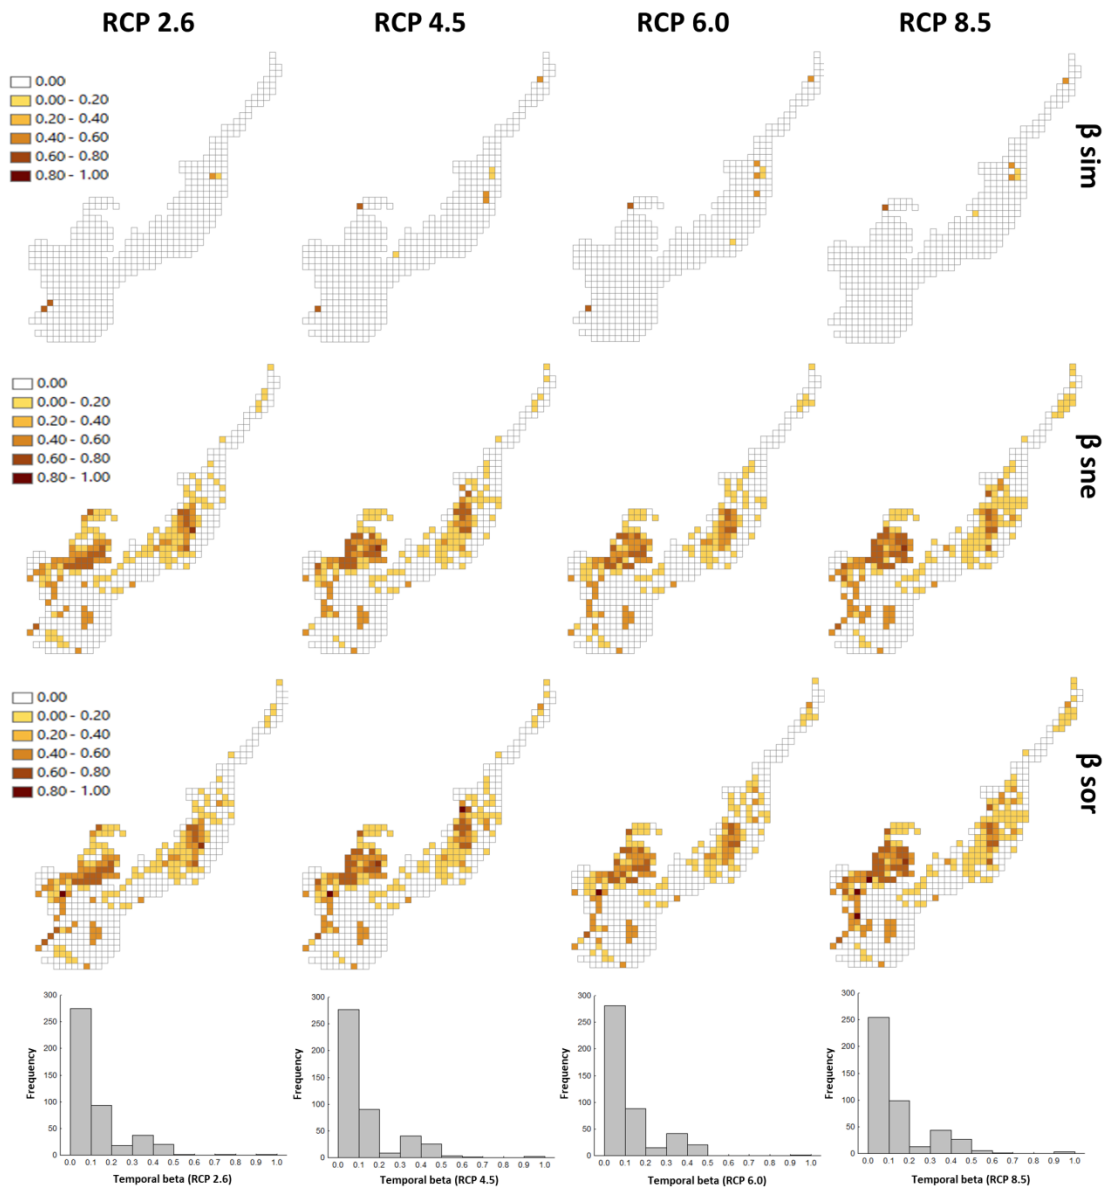

**Fig. S7** Temporal beta diversity of primates in the Atlantic Forest. Optimistic (RCP 2.6), optimistic stabilisation (RCP 4.5), pessimistic stabilisation (RCP 6.0) and pessimistic (RCP 8.5) scenarios. The diversity beta ( $\beta$  sor) was fractionated on turnover ( $\beta$  sim) and nestedness ( $\beta$  sne). Histograms represent the frequency values of  $\beta$  sor for each scenario.

### Friedman analysis - *post hoc* pairwise comparisons

**Table S4** Primate richness *post hoc* pairwise comparisons among scenarios of climate change (CURRENT, RCP 2.6, RCP 4.5, RCP 6.0 and RCP 8.5) in Brazilian Atlantic Forest. P values of pairwise comparisons and the ranks of each scenario are shown.

|               |   | CURRENT | RCP 2.6       | RCP 4.5 | RCP 6.0 | RCP 8.5       | Rank |
|---------------|---|---------|---------------|---------|---------|---------------|------|
| + optimistic  | ↑ | CURRENT | -             |         |         |               | 3.61 |
|               |   | RCP 2.6 | < <b>0.01</b> | -       |         |               | 2.86 |
|               |   | RCP 4.5 | < <b>0.01</b> | 1.00    | -       |               | 2.85 |
|               |   | RCP 6.0 | < <b>0.01</b> | 0.67    | 0.54    | -             | 2.95 |
| + pessimistic | ↓ | RCP 8.5 | < <b>0.01</b> | 0.13    | 0.20    | < <b>0.01</b> | 2.72 |

**Table S5** Primates spatial beta diversity *post hoc* pairwise comparisons among scenarios of climate change (CURRENT, RCP 2.6, RCP 4.5, RCP 6.0 and RCP 8.5) in Brazilian Atlantic Forest. P values of pairwise comparisons and the ranks of each scenario are shown.

|               |   | CURRENT | RCP 2.6       | RCP 4.5       | RCP 6.0       | RCP 8.5       | Rank |
|---------------|---|---------|---------------|---------------|---------------|---------------|------|
| + optimistic  | ↑ | CURRENT | -             |               |               |               | 2.40 |
|               |   | RCP 2.6 | < <b>0.01</b> | -             |               |               | 3.27 |
|               |   | RCP 4.5 | < <b>0.01</b> | 0.94          | -             |               | 3.36 |
|               |   | RCP 6.0 | 0.08          | < <b>0.01</b> | < <b>0.01</b> | -             | 2.67 |
| + pessimistic | ↓ | RCP 8.5 | < <b>0.01</b> | 1.00          | 0.99          | < <b>0.01</b> | 3.31 |

**Table S6** Area of primates distribution *post hoc* pairwise comparisons among scenarios of climate change (CURRENT, RCP 2.6, RCP 4.5, RCP 6.0 and RCP 8.5). P values of pairwise comparisons and the ranks of each scenario are shown.

|               |   | CURRENT | RCP 2.6       | RCP 4.5 | RCP 6.0 | RCP 8.5 | Rank |
|---------------|---|---------|---------------|---------|---------|---------|------|
| + optimistic  | ↑ | CURRENT | -             |         |         |         | 102  |
|               |   | RCP 2.6 | <b>0.03</b>   | -       |         |         | 69   |
|               |   | RCP 4.5 | <b>0.02</b>   | 1.00    | -       |         | 68   |
|               |   | RCP 6.0 | < <b>0.01</b> | 0.90    | 0.93    | -       | 59   |
| + pessimistic | ↓ | RCP 8.5 | 0.17          | 0.95    | 0.93    | 0.49    | 77   |

**Table S7** Temporal primates beta diversity *post hoc* pairwise comparisons among current (C) and future scenarios of climate change (C-RCP 2.6, C-RCP 4.5, C-RCP 6.0 and C-RCP 8.5). P values of pairwise comparisons and the ranks of each scenario are shown.

|               |   | C-RCP<br>2.6 | C-RCP<br>4.5  | C-RCP<br>6.0  | C-RCP<br>8.5  | Rank |
|---------------|---|--------------|---------------|---------------|---------------|------|
| + optimistic  | ↑ | C-RCP 2.6    | -             |               |               | 2.46 |
|               |   | C-RCP 4.5    | 0.89          | -             |               | 2.48 |
|               |   | C-RCP 6.0    | 0.98          | 0.68          | -             | 2.44 |
| + pessimistic | ↓ | C-RCP 8.5    | < <b>0.01</b> | < <b>0.01</b> | < <b>0.01</b> | 2.62 |

## REFERENCES

- Alfaro, J.W.L., Silva, J. de S.E., Rylands, A.B., 2012. How different are robust and gracile capuchin monkeys? An argument for the use of *Sapajus* and *Cebus*. *Am. J. Primatol.* 74, 273–286. <https://doi.org/10.1002/ajp.22007>
- Barros, F.S.M., de Siqueira, M.F., da Costa, D.P., 2012. Modeling the potential geographic distribution of five species of *Metzgeria* Raddi in Brazil, aiming at their conservation. *Bryologist* 115, 341–349. <https://doi.org/10.1639/0007-2745-115.2.341>
- Bellard, C., Leclerc, C., Leroy, B., Bakkenes, M., Veloz, S., Thuiller, W., Courchamp, F., 2014. Vulnerability of biodiversity hotspots to global change. *Glob. Ecol. Biogeogr.* 23, 1376–1386. <https://doi.org/10.1111/geb.12228>
- Burnham, K.P., Anderson, D.R., 2004. Multimodel inference: Understanding AIC and BIC in model selection. *Sociol. Methods Res.* 33, 261–304. <https://doi.org/10.1177/0049124104268644>
- Câmara, I.G., 2003. Brief history of conservation in the Atlantic Forest, in: Galindo-Leal, C., Câmara, I.G. (Eds.), *The Atlantic Forest of South America: Biodiversity status, threats and outlook*. CABS and Island Press, Washington, pp. 267–269.
- Chow, J., Doria, G., Kramer, R., Schneider, T., Stoike, J., 2013. Tropical forests under a changing climate and innovations in tropical forest management. *Trop. Conserv. Sci.* 6, 315–324. <https://doi.org/10.1177/194008291300600302>
- Culot, L., Pereira, L.A., Agostini, I., Almeida, M.A.B. de, Alves, R.S.C., Aximoff, I., Bager, A., Baldovino, M.C., Bella, T.R., Bicca-Marques, J.C., Braga, C., Brocardo, C.R., Campelo, A.K.N., Canale, G.R., Cardoso, J. da C., Carrano, E., Casanova, D.C., Cassano, C.R., Castro, E., Cherem, J.J., Chiarello, A.G., Cosenza, B.A.P., Costa-Araújo, R., Silva, N.C. da, Bitetti, M.S. Di, Ferreira, A.S., Ferreira, P.C.R.,

Fialho, M. de S., Fuzessy, L.F., Garbino, G.S.T., Garcia, F. de O., Gatto, C.A.F.R., Gestich, C.C., Gonçalves, P.R., Gontijo, N.R.C., Graipel, M.E., Guidorizzi, C.E., Hack, R.O.E., Hass, G.P., Hilário, R.R., Hirsch, A., Holzmann, I., Homem, D.H., Júnior, H.E., Júnior, G.S., Kierulff, M.C.M., Knogge, C., Lima, F., Lima, E.F. de, Martins, C.S., Lima, A.A. de, Martins, A., Martins, W.P., Melo, F.R. de, Melzew, R., Miranda, J.M.D., Miranda, F., Moraes, A.M., Moreira, T.C., Morini, M.S. de C., Nagy-Reis, M.B., Oklander, L., Oliveira, L. de C., Paglia, A.P., Pagoto, A., Passamani, M., Passos, F. de C., Peres, C.A., Perine, M.S. de C., Pinto, M.P., Pontes, A.R.M., Carvalho, M.P., Prado, B.H.S. do, Regolin, A.L., Rezende, G.C., Rocha, A., S.Rocha, J. dos, Rodarte, R.R. de P., Sales, L.P., Santos, E. dos, Santos, P.M., Bernardo, C.S.S., Sartorello, R., Serra, L. La, Setz, E., Silva, A.S. de A. e, Silva, L.H. da, Silva, P.B.E. da, Silveira, M., Smith, R.L., Souza, S.M. de, Srбек-Araujo, A.C., Trevelin, L.C., Padua, C.V., Zago, L., Marques, E., Ferrari, S.F., Beltrão-Mendes, R., Henz, D.J., Costa, F.E. da V. da, Ribeiro, I.K., Quintilham, L.L.T., Dums, M., Lombardi, P.M., Bonikowski, R.T.R., Age, S.G., Souza-Alves, J.P., Chagas, R., Cunha, R.G.T. da, Valença-Montenegro, M.M., Ludwig, G., Jerusalinsky, L., Buss, G., Azevedo, R.B. de, Filho, R.F., Bufalo, F., Milhe, L., Santos, M.M. dos, Sepulvida, R., Ferraz, D. da S., Faria, M.B., Ribeiro, M.C., Galetti, M., 2019. ATLANTIC-PRIMATES: A dataset of communities and occurrences of primates in the Atlantic Forests of South America. *Ecology* 100, e02525. <https://doi.org/10.1002/ecy.2525>

Elith, J., Phillips, S.J., Hastie, T., Dudík, M., Chee, Y.E., Yates, C.J., 2011. A statistical explanation of MaxEnt for ecologists. *Divers. Distrib.* 17, 43–57. <https://doi.org/10.1111/j.1472-4642.2010.00725.x>

Hijmans, R.J., Cameron, S.E., Parra, J.L., Jones, P.G., Jarvis, A., 2005. Very high

- resolution interpolated climate surfaces for global land areas. *Int. J. Climatol.* 25, 1965–1978. <https://doi.org/10.1002/joc.1276>
- Huang, C., Kim, S., Altstatt, A., Townshend, J.R.G., Davis, P., Song, K., Tucker, C.J., Rodas, O., Yanosky, A., Clay, R., Musinsky, J., 2007. Rapid loss of Paraguay's Atlantic forest and the status of protected areas - A Landsat assessment. *Remote Sens. Environ.* 106, 460–466. <https://doi.org/10.1016/j.rse.2006.09.016>
- IPCC, 2014. *Climate Change 2014: impacts, adaptation, and vulnerability. summaries, frequently asked questions, and cross-chapter boxes. A contribution of working group II to the Fifth Assessment Report of the Intergovernmental Panel on Climate Change.* World Meteorological Organization, Geneva.
- IUCN, 2016. The International Union for Conservation of Nature Red List of threatened species. URL <http://www.iucnredlist.org>
- Muscarella, R., Galante, P.J., Soley-Guardia, M., Boria, R.A., Kass, J.M., Uriarte, M., Anderson, R.P., 2014. ENMeval: An R package for conducting spatially independent evaluations and estimating optimal model complexity for Maxent ecological niche models. *Methods Ecol. Evol.* 5, 1198–1205. <https://doi.org/10.1111/2041-210X.12261>
- Myers, N., Mittermeier, R.A., Mittermeier, C.G., Fonseca, G.A.B., Kent, J., 2000. Biodiversity hotspots for conservation priorities. *Nature* 403, 853–858. <https://doi.org/10.1038/35002501>
- Pearson, R.G., Raxworthy, C.J., Nakamura, M., Townsend Peterson, A., 2007. Predicting species distributions from small numbers of occurrence records: A test case using cryptic geckos in Madagascar. *J. Biogeogr.* 34, 102–117. <https://doi.org/10.1111/j.1365-2699.2006.01594.x>
- Phillips, S.J., Anderson, R.P., Schapire, R.E., 2006. Maximum entropy modeling of



species geographic distributions. *Ecol. Modell.* 190, 231–259.

<https://doi.org/10.1016/j.ecolmodel.2005.03.026>

- Pinto, L.P., Brito, M.C.W., 2003. Dynamics and biodiversity loss in the Brazilian Atlantic Forests: an introduction, in: Galindo-Leal, C., Câmara, I.G. (Eds.), *The Atlantic Forest of South America: Biodiversity status, threats and outlook*. CABS and Island Press, Washington, pp. 27–30.
- Pinto, M.P., Grelle, C.E.V., 2009. Reserve selection and persistence: Complementing the existing atlantic forest reserve system. *Biodivers. Conserv.* 18, 957–968.  
<https://doi.org/10.1007/s10531-008-9513-2>
- Quinn, G.P., Keough, M.J., 2002. *Experimental design and data analysis for biologists*. Cambridge University Press, Cambridge.
- R Core Team, 2017. R: A language and environment for statistical computing. URL <http://www.r-project.org/>
- Rylands, A.B., Mittermeier, R.A., 2009. The diversity of the New World primates (Platyrrhini): An annotated taxonomy, in: Garber, P.A., Estrada, A., Bicca-Marques, J.C., Heymann, E.W., Strier, K.B. (Eds.), *South American Primates: Comparative perspectives in the study of behavior, ecology, and conservation*. Springer, New York, pp. 23–54.
- Shcheglovitova, M., Anderson, R.P., 2013. Estimating optimal complexity for ecological niche models: A jackknife approach for species with small sample sizes. *Ecol. Modell.* 269, 9–17. <https://doi.org/10.1016/j.ecolmodel.2013.08.011>
- Silva, J.M.C., Casteleti, C.H.M., 2003. Status of the biodiversity of the Atlantic Forest of Brazil, in: Galindo-Leal, C., Câmara, I.G. (Eds.), *The Atlantic Forest of South America: Biodiversity status, threats, and outlook*. CABS and Island Press, Washington, pp. 43–59.

- Warren, D.L., Seifert, S.N., 2011. Ecological niche modeling in Maxent: The importance of model complexity and the performance of model selection criteria. *Ecol. Appl.* 21, 335–342. <https://doi.org/10.1890/10-1171.1>
- Wenger, S.J., Olden, J.D., 2012. Assessing transferability of ecological models: An underappreciated aspect of statistical validation. *Methods Ecol. Evol.* 3, 260–267. <https://doi.org/10.1111/j.2041-210X.2011.00170.x>
- Zuur, A.F., Ieno, E.N., Elphick, C.S., 2010. A protocol for data exploration to avoid common statistical problems. *Methods Ecol. Evol.* 1, 3–14. <https://doi.org/10.1111/j.2041-210X.2009.00001.x>
